# Supplementary material for: High Iron Exposure from the Fetal Stage to Adulthood in Mice Alters Lipid Metabolism
Source: MDPI journal article supplement (doi:10.3390/nu14122451), 2022-06-13
Supplement: s1 [file s1]

**Supplementary Table S1.** List of putative transcription factor binding sites detected in mouse FTH1 upstream 1.0-kb predicted with a dissimilarity margin level less or equal than 15% in PROMO ALGGEN.

| Factor name             | Start position | End position | Dissimilarity | String    | RE equally | RE query |
|-------------------------|----------------|--------------|---------------|-----------|------------|----------|
| AP-1 [T00029]           | 597            | 605          | 5.354713      | TGACTCCCA | 0.03815    | 0.02927  |
| AP-1 [T00029]           | 946            | 954          | 13.075412     | CCAAAGTCA | 0.14496    | 0.17976  |
| AP-1 [T00032]           | 597            | 605          | 9.544233      | TGACTCCCA | 0.06104    | 0.03719  |
| AP-1 [T01140]           | 508            | 514          | 14.285714     | TGAGACA   | 1.28174    | 1.33865  |
| AP-1 [T01140]           | 597            | 603          | 14.285714     | TGACTCC   | 1.28174    | 1.33865  |
| C/EBP [T01388]          | 148            | 154          | 1.299659      | CTGAGCA   | 0.48828    | 0.26141  |
| C/EBP [T01388]          | 283            | 289          | 2.84092       | TGCCCAC   | 0.12207    | 0.04332  |
| C/EBP [T01388]          | 328            | 334          | 0             | TTGTGCA   | 0.36621    | 0.31784  |
| C/EBP [T01388]          | 368            | 374          | 1.541262      | ATGGGCA   | 0.48828    | 0.26141  |
| C/EBP [T01388]          | 979            | 985          | 1.299659      | CTGTGCA   | 0.48828    | 0.26141  |
| C/EBP $\alpha$ [T00104] | 28             | 31           | 0             | AAAT      | 3.90625    | 9.71949  |
| C/EBP $\alpha$ [T00104] | 162            | 165          | 0             | ATTT      | 3.90625    | 9.71949  |
| C/EBP $\alpha$ [T00104] | 217            | 220          | 0             | AAAT      | 3.90625    | 9.71949  |
| C/EBP $\alpha$ [T00104] | 318            | 321          | 0             | AAAT      | 3.90625    | 9.71949  |
| C/EBP $\alpha$ [T00104] | 423            | 426          | 0             | AAAT      | 3.90625    | 9.71949  |
| C/EBP $\alpha$ [T00104] | 582            | 585          | 0             | AAAT      | 3.90625    | 9.71949  |
| C/EBP $\alpha$ [T00104] | 584            | 587          | 0             | ATTT      | 3.90625    | 9.71949  |
| C/EBP $\alpha$ [T00104] | 637            | 640          | 0             | ATTT      | 3.90625    | 9.71949  |
| C/EBP $\alpha$ [T00104] | 694            | 697          | 0             | AAAT      | 3.90625    | 9.71949  |
| C/EBP $\alpha$ [T00104] | 696            | 699          | 0             | ATTT      | 3.90625    | 9.71949  |
| C/EBP $\alpha$ [T00104] | 734            | 737          | 0             | ATTT      | 3.90625    | 9.71949  |
| C/EBP $\alpha$ [T00104] | 754            | 757          | 0             | ATTT      | 3.90625    | 9.71949  |

|                         |     |     |           |          |         |         |
|-------------------------|-----|-----|-----------|----------|---------|---------|
| C/EBP $\alpha$ [T00104] | 776 | 779 | 0         | ATTT     | 3.90625 | 9.71949 |
| C/EBP $\alpha$ [T00104] | 782 | 785 | 0         | AAAT     | 3.90625 | 9.71949 |
| C/EBP $\alpha$ [T00104] | 798 | 801 | 0         | ATTT     | 3.90625 | 9.71949 |
| C/EBP $\alpha$ [T00104] | 857 | 860 | 0         | ATTT     | 3.90625 | 9.71949 |
| C/EBP $\alpha$ [T00104] | 862 | 865 | 0         | AAAT     | 3.90625 | 9.71949 |
| C/EBP $\alpha$ [T00104] | 914 | 917 | 0         | ATTT     | 3.90625 | 9.71949 |
| C/EBP $\alpha$ [T00104] | 920 | 923 | 0         | ATTT     | 3.90625 | 9.71949 |
| C/EBP $\alpha$ [T00105] | 5   | 10  | 2.897783  | TTGCAA   | 0.48828 | 0.52285 |
| C/EBP $\alpha$ [T00105] | 363 | 368 | 2.443272  | TTGCTA   | 0.97656 | 1.0805  |
| C/EBP $\alpha$ [T00105] | 370 | 375 | 0.681767  | GGGCAA   | 0.48828 | 0.32078 |
| C/EBP $\alpha$ [T00105] | 586 | 591 | 2.514221  | TTGCCT   | 0.97656 | 1.0805  |
| C/EBP $\alpha$ [T00107] | 470 | 477 | 14.367318 | TTTGTTT  | 0.36621 | 0.46209 |
| C/EBP $\alpha$ [T00107] | 646 | 653 | 5.228028  | TGGCCAAA | 0.06104 | 0.04527 |
| C/EBP $\alpha$ [T00107] | 689 | 696 | 10.446297 | ATTCCAAA | 0.42725 | 0.36963 |
| C/EBP $\alpha$ [T00107] | 697 | 704 | 4.011491  | TTTGGATA | 0.12207 | 0.20872 |
| C/EBP $\alpha$ [T00107] | 943 | 950 | 10.446297 | GTACCAAA | 0.42725 | 0.36963 |
| C/EBP $\alpha$ [T00108] | 5   | 7   | 0         | TTG      | 15.625  | 18.2634 |
| C/EBP $\alpha$ [T00108] | 8   | 10  | 0         | CAA      | 15.625  | 18.2634 |
| C/EBP $\alpha$ [T00108] | 74  | 76  | 0         | CAA      | 15.625  | 18.2634 |
| C/EBP $\alpha$ [T00108] | 78  | 80  | 0         | CAA      | 15.625  | 18.2634 |
| C/EBP $\alpha$ [T00108] | 139 | 141 | 0         | CAA      | 15.625  | 18.2634 |
| C/EBP $\alpha$ [T00108] | 164 | 166 | 0         | TTG      | 15.625  | 18.2634 |
| C/EBP $\alpha$ [T00108] | 259 | 261 | 0         | CAA      | 15.625  | 18.2634 |
| C/EBP $\alpha$ [T00108] | 307 | 309 | 0         | CAA      | 15.625  | 18.2634 |
| C/EBP $\alpha$ [T00108] | 328 | 330 | 0         | TTG      | 15.625  | 18.2634 |

|                         |     |     |   |     |        |         |
|-------------------------|-----|-----|---|-----|--------|---------|
| C/EBP $\alpha$ [T00108] | 350 | 352 | 0 | TTG | 15.625 | 18.2634 |
| C/EBP $\alpha$ [T00108] | 363 | 365 | 0 | TTG | 15.625 | 18.2634 |
| C/EBP $\alpha$ [T00108] | 373 | 375 | 0 | CAA | 15.625 | 18.2634 |
| C/EBP $\alpha$ [T00108] | 391 | 393 | 0 | CAA | 15.625 | 18.2634 |
| C/EBP $\alpha$ [T00108] | 398 | 400 | 0 | TTG | 15.625 | 18.2634 |
| C/EBP $\alpha$ [T00108] | 415 | 417 | 0 | TTG | 15.625 | 18.2634 |
| C/EBP $\alpha$ [T00108] | 467 | 469 | 0 | TTG | 15.625 | 18.2634 |
| C/EBP $\alpha$ [T00108] | 471 | 473 | 0 | TTG | 15.625 | 18.2634 |
| C/EBP $\alpha$ [T00108] | 480 | 482 | 0 | TTG | 15.625 | 18.2634 |
| C/EBP $\alpha$ [T00108] | 489 | 491 | 0 | TTG | 15.625 | 18.2634 |
| C/EBP $\alpha$ [T00108] | 494 | 496 | 0 | TTG | 15.625 | 18.2634 |
| C/EBP $\alpha$ [T00108] | 499 | 501 | 0 | TTG | 15.625 | 18.2634 |
| C/EBP $\alpha$ [T00108] | 504 | 506 | 0 | TTG | 15.625 | 18.2634 |
| C/EBP $\alpha$ [T00108] | 507 | 509 | 0 | TTG | 15.625 | 18.2634 |
| C/EBP $\alpha$ [T00108] | 554 | 556 | 0 | TTG | 15.625 | 18.2634 |
| C/EBP $\alpha$ [T00108] | 573 | 575 | 0 | CAA | 15.625 | 18.2634 |
| C/EBP $\alpha$ [T00108] | 586 | 588 | 0 | TTG | 15.625 | 18.2634 |
| C/EBP $\alpha$ [T00108] | 604 | 606 | 0 | CAA | 15.625 | 18.2634 |
| C/EBP $\alpha$ [T00108] | 650 | 652 | 0 | CAA | 15.625 | 18.2634 |
| C/EBP $\alpha$ [T00108] | 659 | 661 | 0 | CAA | 15.625 | 18.2634 |
| C/EBP $\alpha$ [T00108] | 665 | 667 | 0 | TTG | 15.625 | 18.2634 |
| C/EBP $\alpha$ [T00108] | 673 | 675 | 0 | CAA | 15.625 | 18.2634 |
| C/EBP $\alpha$ [T00108] | 693 | 695 | 0 | CAA | 15.625 | 18.2634 |
| C/EBP $\alpha$ [T00108] | 698 | 700 | 0 | TTG | 15.625 | 18.2634 |
| C/EBP $\alpha$ [T00108] | 738 | 740 | 0 | CAA | 15.625 | 18.2634 |

|                         |     |     |          |       |         |         |
|-------------------------|-----|-----|----------|-------|---------|---------|
| C/EBP $\alpha$ [T00108] | 750 | 752 | 0        | TTG   | 15.625  | 18.2634 |
| C/EBP $\alpha$ [T00108] | 813 | 815 | 0        | CAA   | 15.625  | 18.2634 |
| C/EBP $\alpha$ [T00108] | 816 | 818 | 0        | TTG   | 15.625  | 18.2634 |
| C/EBP $\alpha$ [T00108] | 859 | 861 | 0        | TTG   | 15.625  | 18.2634 |
| C/EBP $\alpha$ [T00108] | 917 | 919 | 0        | TTG   | 15.625  | 18.2634 |
| C/EBP $\alpha$ [T00108] | 947 | 949 | 0        | CAA   | 15.625  | 18.2634 |
| C/EBP $\alpha$ [T00108] | 962 | 964 | 0        | TTG   | 15.625  | 18.2634 |
| C/EBP $\beta$ [T00017]  | 18  | 22  | 4.211117 | CGTGT | 1.95312 | 1.69217 |
| C/EBP $\beta$ [T00017]  | 58  | 62  | 2.100568 | ACAGT | 1.95312 | 2.09573 |
| C/EBP $\beta$ [T00017]  | 97  | 101 | 2.980795 | GGTGT | 0.97656 | 0.6208  |
| C/EBP $\beta$ [T00017]  | 118 | 122 | 2.460644 | ACATA | 2.92969 | 3.89193 |
| C/EBP $\beta$ [T00017]  | 130 | 134 | 2.100568 | ACAGT | 1.95312 | 2.09573 |
| C/EBP $\beta$ [T00017]  | 138 | 142 | 1.050284 | ACAAT | 1.95312 | 2.82176 |
| C/EBP $\beta$ [T00017]  | 193 | 197 | 3.33089  | ACAGC | 2.92969 | 3.62307 |
| C/EBP $\beta$ [T00017]  | 198 | 202 | 2.100568 | ACAGT | 1.95312 | 2.09573 |
| C/EBP $\beta$ [T00017]  | 247 | 251 | 4.561212 | ACAGA | 1.95312 | 1.75703 |
| C/EBP $\beta$ [T00017]  | 327 | 331 | 1.050284 | ATTGT | 1.95312 | 2.82176 |
| C/EBP $\beta$ [T00017]  | 375 | 379 | 4.211117 | ACACA | 1.95312 | 1.69217 |
| C/EBP $\beta$ [T00017]  | 377 | 381 | 2.460644 | ACATA | 2.92969 | 3.89193 |
| C/EBP $\beta$ [T00017]  | 393 | 397 | 4.211117 | ACACA | 1.95312 | 1.69217 |
| C/EBP $\beta$ [T00017]  | 395 | 399 | 0        | ACATT | 0.97656 | 1.76092 |
| C/EBP $\beta$ [T00017]  | 397 | 401 | 1.050284 | ATTGT | 1.95312 | 2.82176 |
| C/EBP $\beta$ [T00017]  | 405 | 409 | 2.460644 | TATGT | 2.92969 | 3.89193 |
| C/EBP $\beta$ [T00017]  | 414 | 418 | 3.510928 | CTTGT | 2.92969 | 3.62307 |
| C/EBP $\beta$ [T00017]  | 466 | 470 | 3.510928 | TTTGT | 2.92969 | 3.62307 |

|                        |     |     |          |       |         |         |
|------------------------|-----|-----|----------|-------|---------|---------|
| C/EBP $\beta$ [T00017] | 479 | 483 | 3.510928 | TTTGT | 2.92969 | 3.62307 |
| C/EBP $\beta$ [T00017] | 488 | 492 | 3.510928 | TTTGT | 2.92969 | 3.62307 |
| C/EBP $\beta$ [T00017] | 493 | 497 | 3.510928 | TTTGT | 2.92969 | 3.62307 |
| C/EBP $\beta$ [T00017] | 498 | 502 | 3.510928 | TTTGT | 2.92969 | 3.62307 |
| C/EBP $\beta$ [T00017] | 503 | 507 | 3.510928 | TTTGT | 2.92969 | 3.62307 |
| C/EBP $\beta$ [T00017] | 512 | 516 | 4.561212 | ACAGG | 1.95312 | 1.75703 |
| C/EBP $\beta$ [T00017] | 522 | 526 | 4.561212 | TCTGT | 1.95312 | 1.75703 |
| C/EBP $\beta$ [T00017] | 536 | 540 | 3.33089  | GCTGT | 2.92969 | 3.62307 |
| C/EBP $\beta$ [T00017] | 553 | 557 | 3.510928 | TTTGT | 2.92969 | 3.62307 |
| C/EBP $\beta$ [T00017] | 623 | 627 | 2.460644 | CATGT | 2.92969 | 3.89193 |
| C/EBP $\beta$ [T00017] | 725 | 729 | 2.100568 | ACTGT | 1.95312 | 2.09573 |
| C/EBP $\beta$ [T00017] | 749 | 753 | 2.280606 | GTTGT | 2.92969 | 3.89193 |
| C/EBP $\beta$ [T00017] | 807 | 811 | 2.460644 | ACATG | 2.92969 | 3.89193 |
| C/EBP $\beta$ [T00017] | 812 | 816 | 1.050284 | ACAAT | 1.95312 | 2.82176 |
| C/EBP $\beta$ [T00017] | 815 | 819 | 1.050284 | ATTGT | 1.95312 | 2.82176 |
| C/EBP $\beta$ [T00017] | 817 | 821 | 4.211117 | TGTGT | 1.95312 | 1.69217 |
| C/EBP $\beta$ [T00017] | 894 | 898 | 4.211117 | ACACA | 1.95312 | 1.69217 |
| C/EBP $\beta$ [T00017] | 896 | 900 | 2.460644 | ACATA | 2.92969 | 3.89193 |
| C/EBP $\beta$ [T00017] | 899 | 903 | 2.460644 | TATGT | 2.92969 | 3.89193 |
| C/EBP $\beta$ [T00017] | 936 | 940 | 4.561212 | CCTGT | 1.95312 | 1.75703 |
| C/EBP $\beta$ [T00017] | 961 | 965 | 1.050284 | ATTGT | 1.95312 | 2.82176 |
| C/EBP $\beta$ [T00017] | 972 | 976 | 2.460644 | TATGT | 2.92969 | 3.89193 |
| C/EBP $\beta$ [T00017] | 978 | 982 | 4.561212 | TCTGT | 1.95312 | 1.75703 |
| C/EBP $\beta$ [T00459] | 5   | 7   | 0        | TTG   | 15.625  | 18.2634 |
| C/EBP $\beta$ [T00459] | 8   | 10  | 0        | CAA   | 15.625  | 18.2634 |

|                        |     |     |   |     |        |         |
|------------------------|-----|-----|---|-----|--------|---------|
| C/EBP $\beta$ [T00459] | 74  | 76  | 0 | CAA | 15.625 | 18.2634 |
| C/EBP $\beta$ [T00459] | 78  | 80  | 0 | CAA | 15.625 | 18.2634 |
| C/EBP $\beta$ [T00459] | 139 | 141 | 0 | CAA | 15.625 | 18.2634 |
| C/EBP $\beta$ [T00459] | 164 | 166 | 0 | TTG | 15.625 | 18.2634 |
| C/EBP $\beta$ [T00459] | 259 | 261 | 0 | CAA | 15.625 | 18.2634 |
| C/EBP $\beta$ [T00459] | 307 | 309 | 0 | CAA | 15.625 | 18.2634 |
| C/EBP $\beta$ [T00459] | 328 | 330 | 0 | TTG | 15.625 | 18.2634 |
| C/EBP $\beta$ [T00459] | 350 | 352 | 0 | TTG | 15.625 | 18.2634 |
| C/EBP $\beta$ [T00459] | 363 | 365 | 0 | TTG | 15.625 | 18.2634 |
| C/EBP $\beta$ [T00459] | 373 | 375 | 0 | CAA | 15.625 | 18.2634 |
| C/EBP $\beta$ [T00459] | 391 | 393 | 0 | CAA | 15.625 | 18.2634 |
| C/EBP $\beta$ [T00459] | 398 | 400 | 0 | TTG | 15.625 | 18.2634 |
| C/EBP $\beta$ [T00459] | 415 | 417 | 0 | TTG | 15.625 | 18.2634 |
| C/EBP $\beta$ [T00459] | 467 | 469 | 0 | TTG | 15.625 | 18.2634 |
| C/EBP $\beta$ [T00459] | 471 | 473 | 0 | TTG | 15.625 | 18.2634 |
| C/EBP $\beta$ [T00459] | 480 | 482 | 0 | TTG | 15.625 | 18.2634 |
| C/EBP $\beta$ [T00459] | 489 | 491 | 0 | TTG | 15.625 | 18.2634 |
| C/EBP $\beta$ [T00459] | 494 | 496 | 0 | TTG | 15.625 | 18.2634 |
| C/EBP $\beta$ [T00459] | 499 | 501 | 0 | TTG | 15.625 | 18.2634 |
| C/EBP $\beta$ [T00459] | 504 | 506 | 0 | TTG | 15.625 | 18.2634 |
| C/EBP $\beta$ [T00459] | 507 | 509 | 0 | TTG | 15.625 | 18.2634 |
| C/EBP $\beta$ [T00459] | 554 | 556 | 0 | TTG | 15.625 | 18.2634 |
| C/EBP $\beta$ [T00459] | 573 | 575 | 0 | CAA | 15.625 | 18.2634 |
| C/EBP $\beta$ [T00459] | 586 | 588 | 0 | TTG | 15.625 | 18.2634 |
| C/EBP $\beta$ [T00459] | 604 | 606 | 0 | CAA | 15.625 | 18.2634 |

|                        |     |     |           |          |         |         |
|------------------------|-----|-----|-----------|----------|---------|---------|
| C/EBP $\beta$ [T00459] | 650 | 652 | 0         | CAA      | 15.625  | 18.2634 |
| C/EBP $\beta$ [T00459] | 659 | 661 | 0         | CAA      | 15.625  | 18.2634 |
| C/EBP $\beta$ [T00459] | 665 | 667 | 0         | TTG      | 15.625  | 18.2634 |
| C/EBP $\beta$ [T00459] | 673 | 675 | 0         | CAA      | 15.625  | 18.2634 |
| C/EBP $\beta$ [T00459] | 693 | 695 | 0         | CAA      | 15.625  | 18.2634 |
| C/EBP $\beta$ [T00459] | 698 | 700 | 0         | TTG      | 15.625  | 18.2634 |
| C/EBP $\beta$ [T00459] | 738 | 740 | 0         | CAA      | 15.625  | 18.2634 |
| C/EBP $\beta$ [T00459] | 750 | 752 | 0         | TTG      | 15.625  | 18.2634 |
| C/EBP $\beta$ [T00459] | 813 | 815 | 0         | CAA      | 15.625  | 18.2634 |
| C/EBP $\beta$ [T00459] | 816 | 818 | 0         | TTG      | 15.625  | 18.2634 |
| C/EBP $\beta$ [T00459] | 859 | 861 | 0         | TTG      | 15.625  | 18.2634 |
| C/EBP $\beta$ [T00459] | 917 | 919 | 0         | TTG      | 15.625  | 18.2634 |
| C/EBP $\beta$ [T00459] | 947 | 949 | 0         | CAA      | 15.625  | 18.2634 |
| C/EBP $\beta$ [T00459] | 962 | 964 | 0         | TTG      | 15.625  | 18.2634 |
| C/EBP $\beta$ [T00581] | 4   | 10  | 4.018292  | CTTGCAA  | 0.36621 | 0.425   |
| C/EBP $\beta$ [T00581] | 5   | 11  | 2.809597  | TTGCAAT  | 0.18311 | 0.2651  |
| C/EBP $\beta$ [T00581] | 363 | 369 | 3.71163   | TTGCTAT  | 0.42725 | 0.49093 |
| C/EBP $\beta$ [T00581] | 369 | 375 | 1.804066  | TGGGCAA  | 0.30518 | 0.25219 |
| C/EBP $\beta$ [T00581] | 586 | 592 | 6.263409  | TTGCCTG  | 0.12207 | 0.07468 |
| CP2 [T00152]           | 125 | 132 | 13.249285 | CTGGTACA | 0.36621 | 0.18906 |
| CP2 [T00152]           | 343 | 350 | 12.549128 | CTGGCTCT | 0.27466 | 0.16666 |
| CP2 [T00152]           | 378 | 385 | 4.144927  | CATACCAG | 0.09155 | 0.05896 |
| CP2 [T00152]           | 533 | 540 | 12.549128 | CTGGCTGT | 0.27466 | 0.16666 |
| CP2 [T00152]           | 566 | 573 | 11.78931  | CTGGCCTC | 0.12207 | 0.04869 |
| CP2 [T00152]           | 610 | 617 | 8.214579  | CTGGGTTT | 0.35095 | 0.15773 |

|                 |     |     |           |          |         |         |
|-----------------|-----|-----|-----------|----------|---------|---------|
| CP2 [T00152]    | 767 | 774 | 7.531367  | CTGGGAGG | 0.13733 | 0.05611 |
| GATA-1 [T00267] | 698 | 705 | 6.590036  | TTGGATAA | 0.04578 | 0.08525 |
| GATA-1 [T00267] | 827 | 834 | 1.204329  | TTATCGGC | 0.01526 | 0.0115  |
| GATA-1 [T00305] | 698 | 705 | 4.723851  | TTGGATAA | 0.16785 | 0.27481 |
| GATA-1 [T00305] | 827 | 834 | 3.712083  | TTATCGGC | 0.03052 | 0.03103 |
| GATA-1 [T00306] | 114 | 119 | 1.174121  | TATCAC   | 0.48828 | 0.65506 |
| GATA-1 [T00306] | 133 | 138 | 1.174121  | GTGATA   | 0.48828 | 0.65506 |
| GATA-1 [T00306] | 254 | 259 | 0.298794  | TATCTC   | 0.73242 | 1.50427 |
| GATA-1 [T00306] | 426 | 431 | 0.469533  | TATCTT   | 0.73242 | 1.50427 |
| GATA-1 [T00306] | 699 | 704 | 2.76306   | TGGATA   | 0.48828 | 0.65506 |
| GATA-1 [T00306] | 821 | 826 | 2.76306   | TGGATA   | 0.48828 | 0.65506 |
| GATA-1 [T00306] | 828 | 833 | 2.250843  | TATCGG   | 1.46484 | 1.47715 |
| GATA-1 [T00306] | 882 | 887 | 2.76306   | TATCGA   | 0.48828 | 0.65506 |
| GATA-1 [T00306] | 976 | 981 | 0         | TATCTG   | 0.24414 | 0.33435 |
| GATA-2 [T01302] | 110 | 117 | 8.983724  | CGGCTATC | 0.18311 | 0.21354 |
| GATA-2 [T01302] | 135 | 142 | 12.627873 | GATACAAT | 0.36621 | 0.5447  |
| GATA-2 [T01302] | 701 | 708 | 11.858188 | GATAATCT | 0.27466 | 0.49807 |
| GATA-2 [T01302] | 823 | 830 | 13.806911 | GATATTAT | 0.36621 | 0.537   |
| GATA-2 [T01302] | 824 | 831 | 6.518613  | ATATTATC | 0.18311 | 0.35322 |
| GATA-2 [T01302] | 878 | 885 | 12.627873 | TTTATATC | 0.36621 | 0.5447  |
| GATA-3 [T00311] | 251 | 258 | 5.011765  | AAGTATCT | 0.10681 | 0.17988 |
| GATA-3 [T00311] | 423 | 430 | 4.331086  | AAATATCT | 0.07629 | 0.16485 |
| GATA-3 [T00311] | 973 | 980 | 5.011765  | ATGTATCT | 0.10681 | 0.17988 |
| GR [T00333]     | 20  | 22  | 0         | TGT      | 15.625  | 18.2634 |
| GR [T00333]     | 58  | 60  | 0         | ACA      | 15.625  | 18.2634 |



|             |     |     |   |     |        |         |
|-------------|-----|-----|---|-----|--------|---------|
| GR [T00333] | 99  | 101 | 0 | TGT | 15.625 | 18.2634 |
| GR [T00333] | 118 | 120 | 0 | ACA | 15.625 | 18.2634 |
| GR [T00333] | 130 | 132 | 0 | ACA | 15.625 | 18.2634 |
| GR [T00333] | 138 | 140 | 0 | ACA | 15.625 | 18.2634 |
| GR [T00333] | 193 | 195 | 0 | ACA | 15.625 | 18.2634 |
| GR [T00333] | 198 | 200 | 0 | ACA | 15.625 | 18.2634 |
| GR [T00333] | 247 | 249 | 0 | ACA | 15.625 | 18.2634 |
| GR [T00333] | 329 | 331 | 0 | TGT | 15.625 | 18.2634 |
| GR [T00333] | 375 | 377 | 0 | ACA | 15.625 | 18.2634 |
| GR [T00333] | 377 | 379 | 0 | ACA | 15.625 | 18.2634 |
| GR [T00333] | 393 | 395 | 0 | ACA | 15.625 | 18.2634 |
| GR [T00333] | 395 | 397 | 0 | ACA | 15.625 | 18.2634 |
| GR [T00333] | 399 | 401 | 0 | TGT | 15.625 | 18.2634 |
| GR [T00333] | 407 | 409 | 0 | TGT | 15.625 | 18.2634 |
| GR [T00333] | 416 | 418 | 0 | TGT | 15.625 | 18.2634 |
| GR [T00333] | 468 | 470 | 0 | TGT | 15.625 | 18.2634 |
| GR [T00333] | 481 | 483 | 0 | TGT | 15.625 | 18.2634 |
| GR [T00333] | 490 | 492 | 0 | TGT | 15.625 | 18.2634 |
| GR [T00333] | 495 | 497 | 0 | TGT | 15.625 | 18.2634 |
| GR [T00333] | 500 | 502 | 0 | TGT | 15.625 | 18.2634 |
| GR [T00333] | 505 | 507 | 0 | TGT | 15.625 | 18.2634 |
| GR [T00333] | 512 | 514 | 0 | ACA | 15.625 | 18.2634 |
| GR [T00333] | 524 | 526 | 0 | TGT | 15.625 | 18.2634 |
| GR [T00333] | 538 | 540 | 0 | TGT | 15.625 | 18.2634 |
| GR [T00333] | 555 | 557 | 0 | TGT | 15.625 | 18.2634 |

|                    |     |     |          |          |         |         |
|--------------------|-----|-----|----------|----------|---------|---------|
| GR [T00333]        | 625 | 627 | 0        | TGT      | 15.625  | 18.2634 |
| GR [T00333]        | 727 | 729 | 0        | TGT      | 15.625  | 18.2634 |
| GR [T00333]        | 751 | 753 | 0        | TGT      | 15.625  | 18.2634 |
| GR [T00333]        | 807 | 809 | 0        | ACA      | 15.625  | 18.2634 |
| GR [T00333]        | 812 | 814 | 0        | ACA      | 15.625  | 18.2634 |
| GR [T00333]        | 817 | 819 | 0        | TGT      | 15.625  | 18.2634 |
| GR [T00333]        | 819 | 821 | 0        | TGT      | 15.625  | 18.2634 |
| GR [T00333]        | 894 | 896 | 0        | ACA      | 15.625  | 18.2634 |
| GR [T00333]        | 896 | 898 | 0        | ACA      | 15.625  | 18.2634 |
| GR [T00333]        | 901 | 903 | 0        | TGT      | 15.625  | 18.2634 |
| GR [T00333]        | 938 | 940 | 0        | TGT      | 15.625  | 18.2634 |
| GR [T00333]        | 963 | 965 | 0        | TGT      | 15.625  | 18.2634 |
| GR [T00333]        | 974 | 976 | 0        | TGT      | 15.625  | 18.2634 |
| GR [T00333]        | 980 | 982 | 0        | TGT      | 15.625  | 18.2634 |
| GR [T00333]        | 996 | 998 | 0        | ACA      | 15.625  | 18.2634 |
| GR [T00335]        | 234 | 239 | 0        | AGAACT   | 0.24414 | 0.33435 |
| GR [T00335]        | 517 | 522 | 6.726303 | GGTTCT   | 0.48828 | 0.4118  |
| GR [T00335]        | 544 | 549 | 0        | AGAACT   | 0.24414 | 0.33435 |
| MyoD [T00526]      | 194 | 201 | 12.73119 | CAGCACAG | 0.2594  | 0.20736 |
| MyoD [T00526]      | 383 | 390 | 2.345634 | CAGCAGCC | 0.12207 | 0.05525 |
| MyoD [T00526]      | 605 | 612 | 11.00374 | AAGTGCTG | 0.16785 | 0.11647 |
| Nrf2:MafK [T05666] | 58  | 64  | 5.316619 | ACAGTAG  | 0.48828 | 0.46583 |
| Nrf2:MafK [T05666] | 178 | 184 | 1.541262 | TCAGGAT  | 0.48828 | 0.44145 |
| Nrf2:MafK [T05666] | 193 | 199 | 5.316619 | ACAGCAC  | 0.48828 | 0.46583 |
| Nrf2:MafK [T05666] | 247 | 253 | 5.316619 | ACAGAAG  | 0.48828 | 0.46583 |

|                    |     |     |           |              |         |         |
|--------------------|-----|-----|-----------|--------------|---------|---------|
| Nrf2:MafK [T05666] | 340 | 346 | 8.033921  | TTTCTGG      | 0.73242 | 0.65091 |
| Nrf2:MafK [T05666] | 382 | 388 | 9.33358   | CCAGCAG      | 0.97656 | 0.53743 |
| Nrf2:MafK [T05666] | 578 | 584 | 0         | TCAGAAA      | 0.36621 | 0.5362  |
| Nrf2:MafK [T05666] | 607 | 613 | 9.33358   | GTGCTGG      | 0.97656 | 0.53743 |
| Nrf2:MafK [T05666] | 934 | 940 | 5.558222  | TTCCTGT      | 0.48828 | 0.46583 |
| Nrf2:MafK [T05666] | 940 | 946 | 1.299659  | TCAGTAC      | 0.48828 | 0.44145 |
| p53 [T00671]       | 281 | 287 | 5.253995  | AATGCCC      | 0.12207 | 0.05784 |
| p53 [T00671]       | 287 | 293 | 3.057625  | CACGCCC      | 0.12207 | 0.03427 |
| p53 [T00671]       | 370 | 376 | 5.084756  | GGGCAAC      | 0.24414 | 0.06544 |
| p53 [T00671]       | 385 | 391 | 7.965283  | GCAGCCC      | 0.48828 | 0.10994 |
| p53 [T00671]       | 527 | 533 | 8.842914  | ATAGCCC      | 0.36621 | 0.11232 |
| Sp1 [T00755]       | 286 | 294 | 6.497596  | CCACGCCCT    | 0.03815 | 0.00765 |
| Sp1 [T01228]       | 285 | 295 | 13.898109 | CCCACGCCCTA  | 0.06652 | 0.01606 |
| SRF [T00763]       | 692 | 701 | 12.836461 | CCAAATTTGG   | 0.06008 | 0.07257 |
| SRF [T00766]       | 690 | 701 | 13.481114 | TTCCAAATTTGG | 0.03552 | 0.04218 |
| SRF [T00766]       | 692 | 703 | 13.341643 | CCAAATTTGGAT | 0.03552 | 0.04218 |
| YY1 [T00278]       | 108 | 118 | 14.35951  | TGCGGCTATCA  | 0.08011 | 0.02862 |
| YY1 [T00865]       | 10  | 15  | 0.700325  | ATGGAC       | 0.73242 | 0.87617 |
| YY1 [T00865]       | 141 | 146 | 0         | ATGGAG       | 0.24414 | 0.20504 |
| YY1 [T00865]       | 207 | 212 | 2.965889  | TCCCAT       | 0.73242 | 0.59472 |
| YY1 [T00865]       | 261 | 266 | 0.350162  | ATGGAA       | 0.73242 | 0.87617 |
| YY1 [T00865]       | 368 | 373 | 3.316052  | ATGGGC       | 0.73242 | 0.77254 |
| YY1 [T00865]       | 430 | 435 | 0.350162  | TTCCAT       | 0.73242 | 0.87617 |
| YY1 [T00865]       | 838 | 843 | 3.14097   | ACCCAT       | 0.73242 | 0.59472 |
| YY1 [T00915]       | 10  | 15  | 1.17887   | ATGGAC       | 1.2207  | 0.98802 |

|              |     |     |           |           |         |         |
|--------------|-----|-----|-----------|-----------|---------|---------|
| YY1 [T00915] | 141 | 146 | 0.781798  | ATGGAG    | 1.2207  | 0.98802 |
| YY1 [T00915] | 207 | 212 | 2.177379  | TCCCAT    | 0.97656 | 1.05597 |
| YY1 [T00915] | 261 | 266 | 1.708301  | ATGGAA    | 1.2207  | 1.10967 |
| YY1 [T00915] | 368 | 373 | 1.647949  | ATGGGC    | 1.2207  | 1.10967 |
| YY1 [T00915] | 430 | 435 | 1.708301  | TTCCAT    | 1.2207  | 1.10967 |
| YY1 [T00915] | 838 | 843 | 2.045022  | ACCCAT    | 0.97656 | 1.05597 |
| YY1 [T04970] | 187 | 195 | 5.873209  | GCCTAGACA | 0.18311 | 0.12783 |
| YY1 [T04970] | 506 | 514 | 7.047851  | GTTGAGACA | 0.15259 | 0.11378 |
| YY1 [T04970] | 806 | 814 | 11.458499 | CACATGACA | 0.27466 | 0.19711 |
| YY1 [T04970] | 938 | 946 | 10.571776 | TGTCAGTAC | 0.33569 | 0.24819 |

**Supplementary Table S2.** List of putative transcription factor binding sites detected in mouse FTH1 upstream 1.0-kb predicted with cut-off matrix similarity > 0.85 in TRANSCFAC.

| factor name | position | strand | core match | matrix match | sequence (always the (+)-strand is shown) |
|-------------|----------|--------|------------|--------------|-------------------------------------------|
| AP-1        | 100      | (+)    | 0.906      | 0.895        | tgTGATTaatg                               |
| AP-1        | 101      | (-)    | 0.964      | 0.884        | gTGATTaat                                 |
| AP-1        | 544      | (-)    | 0.908      | 0.854        | tagaACTCAct                               |
| AP-1        | 596      | (+)    | 0.983      | 0.953        | tCTGACtccca                               |
| AP-1        | 596      | (+)    | 1          | 0.932        | tcTGACTccca                               |
| AP-1        | 596      | (+)    | 1          | 0.951        | tcTGACTccca                               |
| AP-1        | 596      | (+)    | 1          | 0.916        | tcTGACTccca                               |
| AP-1        | 758      | (-)    | 0.903      | 0.894        | tttaATTCAcc                               |
| AP-1        | 791      | (-)    | 0.903      | 0.896        | agttATTCAtt                               |
| AP-1        | 792      | (+)    | 0.955      | 0.878        | gttATTCAt                                 |
| AP-1        | 809      | (+)    | 0.975      | 0.907        | cATGACaattg                               |
| AP-1        | 809      | (+)    | 0.967      | 0.872        | caTGACAattg                               |
| AP-1        | 809      | (+)    | 0.936      | 0.871        | caTGACAattg                               |
| AP-1        | 935      | (-)    | 0.983      | 0.933        | ttcctGTCAGt                               |
| AP-1        | 935      | (-)    | 0.967      | 0.92         | ttccTGTCAGt                               |
| AP-1        | 935      | (-)    | 0.936      | 0.868        | ttccTGTCAGt                               |
| AP-1        | 935      | (-)    | 0.935      | 0.855        | ttccTGTCAGt                               |
| AP-1        | 947      | (-)    | 0.975      | 0.919        | ccaaaGTCATa                               |
| AP-1        | 947      | (-)    | 1          | 0.9          | ccaaAGTCAta                               |
| AP-1        | 947      | (-)    | 1          | 0.925        | ccaaAGTCAta                               |
| AP-1        | 947      | (-)    | 1          | 0.89         | ccaaAGTCAta                               |
| C/EBP       | 1        | (-)    | 1          | 0.954        | gcaccttGCAATgg                            |

|       |     |     |       |       |                |
|-------|-----|-----|-------|-------|----------------|
| C/EBP | 3   | (+) | 0.984 | 0.881 | atCTTGCaatggac |
| C/EBP | 98  | (+) | 0.94  | 0.937 | ggTGTGAttaatg  |
| C/EBP | 132 | (-) | 0.949 | 0.924 | cagtgaTACAATgg |
| C/EBP | 146 | (+) | 0.885 | 0.852 | agTCTGAgcacta  |
| C/EBP | 147 | (-) | 0.876 | 0.874 | gtctgaGCACTag  |
| C/EBP | 162 | (+) | 0.961 | 0.921 | caTTTGAGAatat  |
| C/EBP | 242 | (-) | 0.889 | 0.893 | aactaaACAGAag  |
| C/EBP | 252 | (-) | 0.944 | 0.909 | aagtatTCAATgg  |
| C/EBP | 326 | (+) | 0.889 | 0.86  | taATTGTgcataa  |
| C/EBP | 326 | (+) | 0.949 | 0.866 | taATTGTgcataaa |
| C/EBP | 327 | (-) | 0.917 | 0.904 | aattgtGCATAaa  |
| C/EBP | 328 | (+) | 0.952 | 0.929 | atTGTGCataaac  |
| C/EBP | 361 | (+) | 0.984 | 0.875 | tcCTTGctatgggc |
| C/EBP | 366 | (+) | 0.945 | 0.894 | gcTATGGgcaaca  |
| C/EBP | 366 | (-) | 0.987 | 0.886 | gctatggGCAACac |
| C/EBP | 404 | (+) | 0.91  | 0.928 | tcTATGTtaacct  |
| C/EBP | 413 | (+) | 0.933 | 0.936 | acCTTGTttaaaaa |
| C/EBP | 469 | (+) | 1     | 0.887 | tgTTTGGttttt   |
| C/EBP | 478 | (+) | 0.965 | 0.855 | ttTTTGTttttt   |
| C/EBP | 487 | (+) | 0.965 | 0.856 | ttTTTGTtttgtt  |
| C/EBP | 502 | (+) | 0.965 | 0.946 | gtTTTGTtgagac  |
| C/EBP | 502 | (+) | 0.933 | 0.859 | gtTTTGTtgagaca |
| C/EBP | 505 | (+) | 0.931 | 0.904 | ttGTTGAgacaggg |
| C/EBP | 521 | (+) | 0.889 | 0.893 | tcTCTGTatagcc  |
| C/EBP | 552 | (+) | 0.965 | 0.938 | acTTTGTtagatca |

|                |     |     |       |       |                    |
|----------------|-----|-----|-------|-------|--------------------|
| C/EBP          | 584 | (+) | 0.984 | 0.855 | aaTTTGcctgcctc     |
| C/EBP          | 643 | (+) | 0.904 | 0.869 | taAGTGGccaaac      |
| C/EBP          | 644 | (-) | 1     | 0.935 | aagtggCCAAAcc      |
| C/EBP          | 686 | (-) | 0.936 | 0.905 | ccctattCCAAAtt     |
| C/EBP          | 687 | (-) | 1     | 0.875 | cctattCCAAAtt      |
| C/EBP          | 696 | (+) | 1     | 0.973 | aaTTTGgataatc      |
| C/EBP          | 696 | (+) | 0.936 | 0.942 | aaTTTGgataatct     |
| C/EBP          | 800 | (-) | 0.979 | 0.923 | ttttagCCACAtg      |
| C/EBP          | 814 | (+) | 0.949 | 0.852 | caATTGTgtggata     |
| C/EBP          | 816 | (+) | 0.944 | 0.894 | atTGTGTggatat      |
| C/EBP          | 818 | (+) | 0.979 | 0.962 | tgTGTGGatatta      |
| C/EBP          | 845 | (-) | 0.941 | 0.855 | tcttcCTTCCctaatttg |
| C/EBP          | 887 | (-) | 0.979 | 0.947 | gagttcCCACAc       |
| C/EBP          | 960 | (+) | 0.949 | 0.915 | ttATTGTaataat      |
| C/EBP          | 977 | (+) | 0.889 | 0.862 | taTCTGTgcatat      |
| C/EBP          | 978 | (-) | 0.917 | 0.899 | atctgtGCATAtg      |
| C/EBP          | 979 | (+) | 0.952 | 0.942 | tcTGTGCatatgc      |
| C/EBP $\alpha$ | 1   | (-) | 1     | 0.916 | gcatcttGCAATgg     |
| C/EBP $\alpha$ | 132 | (-) | 0.929 | 0.876 | cagtgatACAATgg     |
| C/EBP $\alpha$ | 161 | (+) | 0.872 | 0.877 | tcATTTGagaatat     |
| C/EBP $\alpha$ | 161 | (-) | 0.858 | 0.879 | tcatttgAGAATat     |
| C/EBP $\alpha$ | 213 | (+) | 0.875 | 0.891 | tcTTTAAataaaaa     |
| C/EBP $\alpha$ | 213 | (-) | 0.872 | 0.888 | tctttaaATAAAaa     |
| C/EBP $\alpha$ | 252 | (-) | 0.932 | 0.864 | aagtatcTCAATgg     |
| C/EBP $\alpha$ | 326 | (+) | 0.929 | 0.856 | taATTGTgcataaa     |

|                |     |     |       |       |                |
|----------------|-----|-----|-------|-------|----------------|
| C/EBP $\alpha$ | 366 | (-) | 0.979 | 0.893 | gctatggGCAACac |
| C/EBP $\alpha$ | 413 | (+) | 0.903 | 0.916 | acCTTGTttaaaaa |
| C/EBP $\alpha$ | 413 | (-) | 0.875 | 0.889 | accttgtTTAAAAa |
| C/EBP $\alpha$ | 416 | (-) | 0.858 | 0.88  | ttgtttaAAAATat |
| C/EBP $\alpha$ | 505 | (+) | 0.91  | 0.861 | ttGTTGAgacaggg |
| C/EBP $\alpha$ | 575 | (-) | 0.929 | 0.854 | aaactcaGAAATtt |
| C/EBP $\alpha$ | 643 | (-) | 0.92  | 0.859 | taagtggCCAAAcc |
| C/EBP $\alpha$ | 661 | (-) | 0.908 | 0.917 | aacttttGAAACtc |
| C/EBP $\alpha$ | 681 | (+) | 0.929 | 0.858 | atATTCCctattcc |
| C/EBP $\alpha$ | 686 | (-) | 0.92  | 0.855 | ccctattCCAAAtt |
| C/EBP $\alpha$ | 688 | (+) | 0.929 | 0.855 | ctATTCCaaatttg |
| C/EBP $\alpha$ | 696 | (+) | 0.92  | 0.931 | aaTTTGataatct  |
| C/EBP $\alpha$ | 696 | (-) | 0.895 | 0.907 | aatttggATAATct |
| C/EBP $\alpha$ | 775 | (+) | 0.858 | 0.875 | gtATTTTtaaatac |
| C/EBP $\alpha$ | 775 | (-) | 0.861 | 0.878 | gtattttTAAATac |
| C/EBP $\alpha$ | 848 | (+) | 0.903 | 0.913 | tcCTTCCctaattt |
| C/EBP $\alpha$ | 848 | (-) | 0.909 | 0.909 | tccttccCTAATtt |
| C/EBP $\alpha$ | 855 | (-) | 0.929 | 0.854 | ctaatttGAAATgc |
| C/EBP $\alpha$ | 887 | (+) | 0.908 | 0.861 | gaGTTCCcacacat |
| C/EBP $\alpha$ | 958 | (-) | 0.966 | 0.893 | ctttattGTAATat |
| C/EBP $\alpha$ | 960 | (+) | 0.929 | 0.863 | ttATTGTaatatat |
| C/EBP $\beta$  | 1   | (+) | 1     | 0.931 | gcatcttGCAATgg |
| C/EBP $\beta$  | 1   | (-) | 1     | 0.886 | gcatctTGCAAtgg |
| C/EBP $\beta$  | 174 | (-) | 0.981 | 0.892 | tgCTTTCaggatta |
| C/EBP $\beta$  | 661 | (+) | 0.966 | 0.954 | aacttttGAAACtc |



|               |     |     |       |       |                |
|---------------|-----|-----|-------|-------|----------------|
| C/EBP $\beta$ | 661 | (-) | 0.865 | 0.872 | aactttTGAAActc |
| C/EBP $\beta$ | 848 | (-) | 0.95  | 0.954 | tcCTTCCctaattt |
| C/EBP $\beta$ | 887 | (-) | 0.935 | 0.911 | gaGTTCCcacacat |
| C/EBP $\beta$ | 958 | (+) | 0.981 | 0.897 | ctttattGTAATat |
| CP2           | 344 | (-) | 0.974 | 0.853 | CTGGCtcttga    |
| GATA1         | 100 | (+) | 0.985 | 0.965 | tgtGATTaAt     |
| GATA1         | 110 | (-) | 0.993 | 0.944 | gcggcTATCacata |
| GATA1         | 110 | (-) | 0.96  | 0.913 | gcggCTATCacata |
| GATA1         | 110 | (-) | 0.991 | 0.954 | gcggcTATCacat  |
| GATA1         | 112 | (-) | 1     | 0.981 | ggCTATCaca     |
| GATA1         | 131 | (+) | 0.993 | 0.935 | acagTGATAcaatg |
| GATA1         | 131 | (+) | 0.945 | 0.898 | acagtGATACaatg |
| GATA1         | 132 | (+) | 0.991 | 0.922 | cagTGATAcaatg  |
| GATA1         | 133 | (+) | 0.993 | 0.97  | agtGATACaa     |
| GATA1         | 156 | (+) | 0.983 | 0.972 | ctaGATCatt     |
| GATA1         | 156 | (-) | 0.985 | 0.96  | ctAGATCatt     |
| GATA1         | 180 | (+) | 0.985 | 0.977 | cagGATTAgc     |
| GATA1         | 203 | (+) | 0.988 | 0.967 | tgaGATCCca     |
| GATA1         | 203 | (-) | 0.985 | 0.964 | tgAGATCcca     |
| GATA1         | 208 | (-) | 1     | 0.974 | tcCCATCttt     |
| GATA1         | 250 | (-) | 1     | 0.947 | agaagTATCTcaat |
| GATA1         | 250 | (-) | 0.945 | 0.899 | agaaGTATCtcaat |
| GATA1         | 250 | (-) | 1     | 0.936 | agaagTATCTcaa  |
| GATA1         | 252 | (-) | 0.993 | 0.975 | aaGTATCtca     |
| GATA1         | 299 | (-) | 0.988 | 0.973 | ttTCATCctc     |

|       |     |     |       |       |                 |
|-------|-----|-----|-------|-------|-----------------|
| GATA1 | 350 | (+) | 0.985 | 0.973 | cttGATCTtc      |
| GATA1 | 350 | (-) | 0.983 | 0.972 | ctTGATCttc      |
| GATA1 | 356 | (-) | 0.988 | 0.962 | ctTCATCctt      |
| GATA1 | 422 | (-) | 1     | 0.941 | aaaaaTATCTtcca  |
| GATA1 | 422 | (-) | 0.937 | 0.893 | aaaaATATCttcca  |
| GATA1 | 422 | (-) | 1     | 0.939 | aaaaaTATCTtcc   |
| GATA1 | 424 | (-) | 0.99  | 0.98  | aaATATCttc      |
| GATA1 | 557 | (+) | 0.983 | 0.972 | gtaGATCagg      |
| GATA1 | 557 | (-) | 0.985 | 0.977 | gtAGATCagg      |
| GATA1 | 697 | (+) | 0.986 | 0.939 | atttGGATAatctt  |
| GATA1 | 697 | (+) | 1     | 0.945 | atttgGATAAtctt  |
| GATA1 | 698 | (+) | 0.965 | 0.932 | tttGGATAatctt   |
| GATA1 | 699 | (+) | 0.988 | 0.96  | ttgGATAAtc      |
| GATA1 | 699 | (+) | 1     | 0.909 | ttgGATAAtc      |
| GATA1 | 699 | (+) | 1     | 0.877 | ttgGATAAtc      |
| GATA1 | 702 | (-) | 0.985 | 0.96  | gaTAATCttt      |
| GATA1 | 731 | (+) | 0.987 | 0.957 | ataGATTTca      |
| GATA1 | 819 | (+) | 0.986 | 0.937 | gtgtGGATAAttatc |
| GATA1 | 819 | (+) | 0.937 | 0.9   | gtgtgGATATtadc  |
| GATA1 | 820 | (+) | 0.965 | 0.901 | tgtGGATAAttatc  |
| GATA1 | 821 | (+) | 0.99  | 0.974 | gtgGATATta      |
| GATA1 | 824 | (-) | 0.991 | 0.946 | gatatTATCGgcta  |
| GATA1 | 824 | (-) | 1     | 0.938 | gataTTATCggcta  |
| GATA1 | 824 | (-) | 0.965 | 0.952 | gatatTATCGgct   |
| GATA1 | 826 | (-) | 0.988 | 0.979 | taTTATCggc      |

|       |     |     |       |       |                |
|-------|-----|-----|-------|-------|----------------|
| GATA1 | 826 | (-) | 1     | 0.957 | taTTATCggc     |
| GATA1 | 826 | (-) | 1     | 0.924 | taTTATCggc     |
| GATA1 | 878 | (-) | 0.991 | 0.924 | gtttaTATCGagtt |
| GATA1 | 878 | (-) | 0.937 | 0.896 | gtttATATCgagtt |
| GATA1 | 878 | (-) | 0.965 | 0.912 | gtttaTATCGagt  |
| GATA1 | 880 | (-) | 0.99  | 0.974 | ttATATCgag     |
| GATA1 | 917 | (+) | 0.987 | 0.961 | tttGATTTtt     |
| GATA1 | 928 | (-) | 0.988 | 0.977 | tcTCATCttc     |
| GATA1 | 972 | (-) | 1     | 0.938 | atatgTATCTgtgc |
| GATA1 | 972 | (-) | 0.945 | 0.897 | atatGTATCtgtgc |
| GATA1 | 972 | (-) | 1     | 0.946 | atatgTATCTgtg  |
| GATA1 | 974 | (-) | 0.993 | 0.97  | atGTATCtgt     |
| GATA1 | 988 | (-) | 0.993 | 0.972 | atGCATCcca     |
| GATA2 | 100 | (+) | 0.971 | 0.961 | tgtGATTAat     |
| GATA2 | 112 | (-) | 1     | 0.996 | ggCTATCaca     |
| GATA2 | 133 | (+) | 0.995 | 0.98  | agtGATACaa     |
| GATA2 | 133 | (+) | 0.931 | 0.909 | agtGATACaa     |
| GATA2 | 156 | (+) | 0.971 | 0.952 | ctaGATCatt     |
| GATA2 | 156 | (-) | 0.972 | 0.958 | ctAGATCatt     |
| GATA2 | 180 | (+) | 0.971 | 0.964 | cagGATTAgc     |
| GATA2 | 203 | (+) | 0.974 | 0.969 | tgaGATCCca     |
| GATA2 | 203 | (-) | 0.972 | 0.968 | tgAGATCcca     |
| GATA2 | 208 | (-) | 0.987 | 0.974 | tcCCATCttt     |
| GATA2 | 252 | (-) | 0.995 | 0.988 | aaGTATCtca     |
| GATA2 | 299 | (-) | 0.979 | 0.967 | ttTCATCctc     |

|       |     |     |       |       |            |
|-------|-----|-----|-------|-------|------------|
| GATA2 | 350 | (+) | 0.972 | 0.953 | cttGATCTtc |
| GATA2 | 350 | (-) | 0.971 | 0.961 | ctTGATCttc |
| GATA2 | 356 | (-) | 0.979 | 0.966 | ctTCATCctt |
| GATA2 | 424 | (-) | 0.994 | 0.986 | aaATATCttc |
| GATA2 | 557 | (+) | 0.971 | 0.955 | gtaGATCagg |
| GATA2 | 557 | (-) | 0.972 | 0.963 | gtAGATCagg |
| GATA2 | 699 | (+) | 0.992 | 0.972 | ttgGATAAtc |
| GATA2 | 699 | (+) | 1     | 0.922 | ttgGATAAtc |
| GATA2 | 702 | (-) | 0.971 | 0.96  | gaTAATCttt |
| GATA2 | 731 | (+) | 0.972 | 0.951 | ataGATTTca |
| GATA2 | 821 | (+) | 0.994 | 0.973 | gtgGATATta |
| GATA2 | 821 | (+) | 0.954 | 0.881 | gtgGATATta |
| GATA2 | 826 | (-) | 0.992 | 0.985 | taTTATCggc |
| GATA2 | 826 | (-) | 1     | 0.948 | taTTATCggc |
| GATA2 | 826 | (-) | 1     | 0.943 | taTTATCggc |
| GATA2 | 880 | (-) | 0.994 | 0.968 | ttATATCgag |
| GATA2 | 880 | (-) | 0.954 | 0.893 | ttATATCgag |
| GATA2 | 917 | (+) | 0.972 | 0.952 | tttGATTTtt |
| GATA2 | 928 | (-) | 0.979 | 0.971 | tcTCATCttc |
| GATA2 | 928 | (-) | 0.871 | 0.881 | tcTCATCttc |
| GATA2 | 974 | (-) | 0.995 | 0.982 | atGTATCtgt |
| GATA2 | 988 | (-) | 0.982 | 0.972 | atGCATCcca |
| GATA3 | 100 | (+) | 0.925 | 0.86  | tgtGATTAat |
| GATA3 | 101 | (+) | 0.962 | 0.932 | gtGATTAat  |
| GATA3 | 112 | (-) | 1     | 0.969 | ggCTATCac  |

|       |     |     |       |       |            |
|-------|-----|-----|-------|-------|------------|
| GATA3 | 133 | (+) | 0.878 | 0.86  | agtGATACaa |
| GATA3 | 133 | (+) | 0.896 | 0.86  | agtGATACaa |
| GATA3 | 134 | (+) | 0.974 | 0.951 | gtGATACaa  |
| GATA3 | 156 | (-) | 0.936 | 0.929 | ctAGATCat  |
| GATA3 | 156 | (+) | 0.928 | 0.871 | ctaGATCAtt |
| GATA3 | 156 | (+) | 0.977 | 0.862 | ctaGATCAtt |
| GATA3 | 156 | (-) | 1     | 0.857 | ctAGATCatt |
| GATA3 | 157 | (+) | 0.944 | 0.917 | taGATCAtt  |
| GATA3 | 181 | (+) | 0.962 | 0.933 | agGATTAgc  |
| GATA3 | 203 | (-) | 0.936 | 0.913 | tgAGATCcc  |
| GATA3 | 203 | (+) | 0.915 | 0.869 | tgaGATCCca |
| GATA3 | 203 | (-) | 1     | 0.868 | tgAGATCcca |
| GATA3 | 204 | (+) | 0.933 | 0.915 | gaGATCCca  |
| GATA3 | 208 | (-) | 0.969 | 0.952 | tcCCATCtt  |
| GATA3 | 208 | (-) | 0.87  | 0.88  | tcCCATCttt |
| GATA3 | 252 | (-) | 0.974 | 0.949 | aaGTATCtc  |
| GATA3 | 299 | (-) | 0.954 | 0.928 | ttTCATCct  |
| GATA3 | 299 | (-) | 0.917 | 0.867 | ttTCATCctc |
| GATA3 | 350 | (-) | 0.944 | 0.94  | ctTGATCtt  |
| GATA3 | 350 | (-) | 0.928 | 0.878 | ctTGATCttc |
| GATA3 | 350 | (-) | 0.977 | 0.854 | ctTGATCttc |
| GATA3 | 351 | (+) | 0.936 | 0.906 | ttGATCTtc  |
| GATA3 | 356 | (-) | 0.954 | 0.945 | ctTCATCct  |
| GATA3 | 424 | (-) | 0.977 | 0.95  | aaATATCtt  |
| GATA3 | 424 | (-) | 0.981 | 0.872 | aaATATCttc |

|       |     |     |       |       |                     |
|-------|-----|-----|-------|-------|---------------------|
| GATA3 | 557 | (-) | 0.936 | 0.905 | gtAGATCag           |
| GATA3 | 557 | (+) | 0.928 | 0.872 | gtaGATCagg          |
| GATA3 | 558 | (+) | 0.944 | 0.943 | taGATCagg           |
| GATA3 | 699 | (+) | 1     | 0.892 | ttgGATAAtc          |
| GATA3 | 700 | (+) | 0.985 | 0.951 | tgGATAAtc           |
| GATA3 | 702 | (-) | 0.962 | 0.935 | gaTAATCtt           |
| GATA3 | 702 | (-) | 0.925 | 0.877 | gaTAATCttt          |
| GATA3 | 702 | (-) | 0.945 | 0.875 | gaTAATCttt          |
| GATA3 | 731 | (+) | 0.968 | 0.943 | ataGATTTca          |
| GATA3 | 732 | (+) | 0.953 | 0.931 | taGATTTca           |
| GATA3 | 821 | (+) | 0.981 | 0.885 | gtgGATATta          |
| GATA3 | 822 | (+) | 0.977 | 0.95  | tgGATATta           |
| GATA3 | 826 | (-) | 0.985 | 0.961 | taTTATCgg           |
| GATA3 | 826 | (-) | 1     | 0.943 | taTTATCggc          |
| GATA3 | 826 | (-) | 0.958 | 0.874 | taTTATCggc          |
| GATA3 | 880 | (-) | 0.977 | 0.95  | ttATATCga           |
| GATA3 | 880 | (-) | 0.981 | 0.876 | ttATATCgag          |
| GATA3 | 918 | (+) | 0.953 | 0.922 | ttGATTTtt           |
| GATA3 | 928 | (-) | 0.954 | 0.938 | tcTCATCtt           |
| GATA3 | 928 | (-) | 0.917 | 0.905 | tcTCATCttc          |
| GATA3 | 928 | (-) | 0.932 | 0.899 | tcTCATCttc          |
| GATA3 | 974 | (-) | 0.974 | 0.945 | atGTATCtg           |
| GATA3 | 988 | (-) | 0.943 | 0.913 | atGCATCcc           |
| GR    | 10  | (+) | 0.986 | 0.94  | aatggactgcgTGTGCTag |
| GR    | 12  | (+) | 0.96  | 0.852 | tggactgcgtGTGCTa    |

|       |     |     |       |       |                     |
|-------|-----|-----|-------|-------|---------------------|
| GR    | 126 | (-) | 0.984 | 0.87  | ctgGTACAgtgatacaatg |
| GR    | 194 | (-) | 0.986 | 0.961 | acaGCACAgtgagatccca |
| GR    | 319 | (+) | 0.986 | 0.88  | aaatatataatTGTGCata |
| GR    | 471 | (+) | 0.875 | 0.854 | tttggtttttTGTTTttt  |
| GR    | 480 | (+) | 0.875 | 0.854 | tttggtttttTGTTTtgt  |
| GR    | 490 | (+) | 0.875 | 0.852 | ttgttttggtTGTTTtgt  |
| GR    | 528 | (+) | 0.989 | 0.939 | atagccctggcTGTCCtag |
| GR    | 615 | (+) | 0.986 | 0.856 | gtttaaaggcaTGTGCcac |
| GR    | 970 | (+) | 0.986 | 0.904 | atatatgtatcTGTGCata |
| MyoD  | 602 | (+) | 0.873 | 0.851 | tccCAAGTgctg        |
| MyoD  | 621 | (+) | 0.905 | 0.861 | aggCATGTgcca        |
| MyoD  | 622 | (+) | 0.851 | 0.889 | ggCATGTgcc          |
| MyoD  | 762 | (-) | 1     | 0.856 | attcACCTGgga        |
| MyoD  | 763 | (+) | 1     | 0.921 | ttCACCTggg          |
| MyoD  | 804 | (-) | 0.905 | 0.861 | agccACATGaca        |
| MyoD  | 805 | (-) | 0.851 | 0.882 | gccACATGac          |
| NRF-2 | 261 | (+) | 1     | 0.868 | aatGGAAGag          |
| NRF-2 | 932 | (-) | 1     | 0.901 | atCTTCctgt          |
| p53   | 587 | (+) | 0.965 | 0.882 | ttgCCTGCct          |
| p53   | 621 | (+) | 1     | 0.87  | aggCATGTgc          |
| p53   | 621 | (-) | 1     | 0.922 | agGCATGtgc          |
| p53   | 652 | (+) | 0.965 | 0.897 | aaaCCTGCca          |
| p53   | 865 | (+) | 1     | 0.91  | atgCATGCct          |
| p53   | 865 | (-) | 1     | 0.878 | atGCATGcct          |
| Sp1   | 286 | (-) | 0.949 | 0.9   | cccACGCCct          |

|     |     |     |       |       |                    |
|-----|-----|-----|-------|-------|--------------------|
| Sp1 | 563 | (+) | 0.962 | 0.873 | caGGCTGgcc         |
| Sp1 | 588 | (-) | 0.972 | 0.908 | tgcCTGCCtc         |
| Sp1 | 653 | (-) | 0.972 | 0.897 | aacCTGCCaa         |
| Sp1 | 866 | (-) | 0.921 | 0.852 | tgcATGCCtt         |
| Sp1 | 902 | (+) | 0.915 | 0.872 | tgtgGGTGGgagt      |
| Sp1 | 903 | (+) | 0.872 | 0.854 | gtGGGTGgga         |
| SRF | 691 | (+) | 0.99  | 0.922 | ttCCAAAttggat      |
| SRF | 691 | (-) | 0.99  | 0.92  | ttccaaaTTTGat      |
| SRF | 692 | (+) | 0.867 | 0.851 | tccaaaTTTGataa     |
| YY1 | 3   | (-) | 1     | 0.9   | atcttgcaATGGAActgc |
| YY1 | 134 | (-) | 1     | 0.922 | gtgatacaATGGAgtct  |
| YY1 | 156 | (+) | 0.922 | 0.891 | ctagATCATttgagaat  |
| YY1 | 165 | (-) | 0.906 | 0.907 | ttgagaatATGCTtca   |
| YY1 | 205 | (+) | 0.996 | 0.984 | agatCCCATctttaa    |
| YY1 | 254 | (-) | 1     | 0.899 | gtatctcaATGGAagag  |
| YY1 | 361 | (-) | 0.996 | 0.869 | tccttgctATGGGcaac  |
| YY1 | 428 | (+) | 1     | 0.95  | atctTCCATataaaccc  |
| YY1 | 618 | (+) | 0.904 | 0.866 | taaaGGCATgtgccacc  |
| YY1 | 792 | (+) | 0.922 | 0.898 | gttaTTCATtttagcca  |
| YY1 | 802 | (-) | 0.92  | 0.891 | ttagccacATGACaatt  |
| YY1 | 836 | (+) | 0.996 | 0.91  | taaaCCCATcttctctt  |
| YY1 | 857 | (-) | 0.906 | 0.875 | aatttgaaATGCAtgcc  |
| YY1 | 892 | (+) | 0.902 | 0.86  | cccaCACATatgtgggt  |
| YY1 | 893 | (-) | 0.902 | 0.864 | ccacacatATGTGggtg  |
| YY1 | 925 | (+) | 0.918 | 0.887 | ttctCTCATcttctgt   |



|     |     |     |       |       |                   |
|-----|-----|-----|-------|-------|-------------------|
| YY1 | 966 | (-) | 0.906 | 0.887 | taatatatATGTAtctg |
| YY1 | 979 | (+) | 0.906 | 0.864 | tctgTGCATatgcatcc |
| YY1 | 980 | (-) | 0.906 | 0.879 | ctgtgcatATGCAtccc |

**Supplementary Table S3.** List of putative transcription factor binding sites detected in mouse FTH1 upstream 1.0-kb predicted with cut-off Score > 0.85 in TF BIND.

| ID       | Score    | Loc. | Str. | Consensus      | Sequence       |
|----------|----------|------|------|----------------|----------------|
| AP1_C    | 0.871429 | 101  | (-)  | NTGASTCAG      | GTGATTAAT      |
| AP1_C    | 0.85277  | 597  | (-)  | NTGASTCAG      | CTGACTCCC      |
| AP1_C    | 0.856268 | 792  | (-)  | NTGASTCAG      | GTTATTCAT      |
| AP1_Q6   | 0.872508 | 596  | (+)  | NNTGACTCANN    | TCTGACTCCCA    |
| CEBP_01  | 0.883306 | 404  | (+)  | NNTKTGGWNANNN  | TCTATGTTAACCT  |
| CEBP_01  | 0.935494 | 469  | (+)  | NNTKTGGWNANNN  | TGTTTGTTTTTTT  |
| CEBP_01  | 0.871637 | 487  | (+)  | NNTKTGGWNANNN  | TTTTTGTTTTGTT  |
| CEBP_01  | 0.914749 | 687  | (-)  | NNTKTGGWNANNN  | CCTATTCCAAATT  |
| CEBP_01  | 0.947488 | 696  | (+)  | NNTKTGGWNANNN  | AATTTGGATAATC  |
| CEBP_01  | 0.929011 | 818  | (+)  | NNTKTGGWNANNN  | TGTGTGGATATTA  |
| CEBP_01  | 0.926742 | 887  | (-)  | NNTKTGGWNANNN  | GAGTTCCCACACA  |
| CEBP_01  | 0.9141   | 979  | (+)  | NNTKTGGWNANNN  | TCTGTGCATATGC  |
| CEBP_Q2  | 0.859404 | 1    | (-)  | NNNTTGCNNAANNN | GCATCTTGCAATGG |
| CEBP_Q2  | 0.860876 | 413  | (+)  | NNNTTGCNNAANNN | ACCTTGTTTAAAAA |
| CEBP_Q2  | 0.853147 | 696  | (+)  | NNNTTGCNNAANNN | AATTTGGATAATCT |
| CEBPA_01 | 0.876809 | 696  | (+)  | NNATTRCNNAANNN | AATTTGGATAATCT |
| CEBPB_01 | 0.867509 | 733  | (-)  | RNRTKNNGMAAKNN | AGATTTCAACTTA  |
| CEBPB_01 | 0.857355 | 1    | (+)  | RNRTKNNGMAAKNN | GCATCTTGCAATGG |
| CEBPB_01 | 0.855869 | 505  | (+)  | RNRTKNNGMAAKNN | TTGTTGAGACAGGG |

|          |          |     |     |                      |                     |
|----------|----------|-----|-----|----------------------|---------------------|
| CEBPB_01 | 0.854631 | 661 | (+) | RNRTKNNGMAAKNN       | AACTTTTGAAACTC      |
| CP2_01   | 0.914666 | 363 | (-) | GCNMNAMCMAG          | CTTGCTATGGG         |
| CP2_01   | 0.886364 | 834 | (+) | GCNMNAMCMAG          | GCTAAACCCAT         |
| CP2_01   | 0.867496 | 344 | (-) | GCNMNAMCMAG          | CTGGCTCTGA          |
| CP2_01   | 0.858919 | 648 | (+) | GCNMNAMCMAG          | GGCCAAACCTG         |
| CP2_01   | 0.856775 | 72  | (+) | GCNMNAMCMAG          | AGCCAACCAAG         |
| GATA1_01 | 0.90079  | 112 | (-) | SNNGATNNNN           | GGCTATCACA          |
| GATA1_01 | 0.8692   | 252 | (-) | SNNGATNNNN           | AAGTATCTCA          |
| GATA1_01 | 0.875617 | 424 | (-) | SNNGATNNNN           | AAATATCTTC          |
| GATA1_01 | 0.857354 | 826 | (-) | SNNGATNNNN           | TATTATCGGC          |
| GATA1_03 | 0.863792 | 926 | (-) | RNSNNGATAANNGN       | TCTCTCATCTTCT       |
| GATA1_04 | 0.887255 | 110 | (-) | NNCWGATARNNNN        | GCGGCTATCACAT       |
| GATA2_01 | 0.943166 | 112 | (-) | NNNGATRNNN           | GGCTATCACA          |
| GATA2_01 | 0.913848 | 252 | (-) | NNNGATRNNN           | AAGTATCTCA          |
| GATA2_01 | 0.908886 | 424 | (-) | NNNGATRNNN           | AAATATCTTC          |
| GATA2_01 | 0.869193 | 826 | (-) | NNNGATRNNN           | TATTATCGGC          |
| GATA2_01 | 0.85972  | 988 | (-) | NNNGATRNNN           | ATGCATCCCA          |
| GATA3_01 | 0.87284  | 112 | (-) | NNGATARNG            | GGCTATCAC           |
| GATA3_01 | 0.894107 | 208 | (-) | NNGATARNG            | TCCCATCTT           |
| GATA3_01 | 0.863093 | 826 | (-) | NNGATARNG            | TATTATCGG           |
| GATA3_01 | 0.865751 | 928 | (-) | NNGATARNG            | TCTCATCTT           |
| GR_Q6    | 0.879464 | 194 | (-) | NNNNNNC NNTNTGTNCTNN | ACAGCACAGTGAGATCCCA |

|         |          |     |     |                 |                 |
|---------|----------|-----|-----|-----------------|-----------------|
| MYOD_01 | 0.897047 | 621 | (+) | SRACAGGTGKYG    | AGGCATGTGCCA    |
| MYOD_01 | 0.850197 | 804 | (-) | SRACAGGTGKYG    | AGCCACATGACA    |
| MYOD_Q6 | 0.874152 | 622 | (+) | NNCANCTGNY      | GGCATGTGCC      |
| NRF2_01 | 0.925388 | 932 | (-) | ACCGGAAGNS      | ATCTTCCTGT      |
| NRF2_01 | 0.853924 | 261 | (+) | ACCGGAAGNS      | AATGGAAGAG      |
| P53_02  | 0.890387 | 564 | (-) | NGRCWTGYCY      | AGGCTGGCCT      |
| P53_02  | 0.885991 | 564 | (+) | NGRCWTGYCY      | AGGCTGGCCT      |
| P53_02  | 0.867233 | 583 | (+) | NGRCWTGYCY      | AAATTTGCCT      |
| P53_02  | 0.899766 | 621 | (-) | NGRCWTGYCY      | AGGCATGTGC      |
| P53_02  | 0.856975 | 621 | (+) | NGRCWTGYCY      | AGGCATGTGC      |
| P53_02  | 0.872802 | 652 | (+) | NGRCWTGYCY      | AAACCTGCCA      |
| P53_02  | 0.862837 | 652 | (-) | NGRCWTGYCY      | AAACCTGCCA      |
| P53_02  | 0.91823  | 865 | (+) | NGRCWTGYCY      | ATGCATGCCT      |
| P53_02  | 0.866061 | 865 | (-) | NGRCWTGYCY      | ATGCATGCCT      |
| SP1_01  | 0.855323 | 280 | (-) | GRGGCRGGGW      | AGAATGCCCA      |
| SP1_01  | 0.908834 | 588 | (-) | GRGGCRGGGW      | TGCCTGCCTC      |
| SP1_01  | 0.85051  | 653 | (-) | GRGGCRGGGW      | AACCTGCCAA      |
| SP1_01  | 0.855606 | 866 | (-) | GRGGCRGGGW      | TGCATGCCTT      |
| SP1_01  | 0.864666 | 903 | (+) | GRGGCRGGGW      | GTGGGTGGGA      |
| SRF_C   | 0.870696 | 689 | (-) | NCCWTATATGGNCWN | TATTCCAAATTTGGA |
| SRF_C   | 0.87052  | 692 | (+) | NCCWTATATGGNCWN | TCCAAATTTGGATAA |
| SRF_Q6  | 0.909975 | 691 | (+) | GNCCAWATAWGGMN  | TTCCAAATTTGGAT  |

|        |          |     |     |                   |                   |
|--------|----------|-----|-----|-------------------|-------------------|
| SRF_Q6 | 0.902156 | 691 | (-) | GNCCAWATAWGGMN    | TTCCAAATTTGGAT    |
| YY1_01 | 0.861402 | 134 | (-) | NNNNNCCATNTWNNNWN | GTGATACAATGGAGTCT |
| YY1_01 | 0.854849 | 205 | (+) | NNNNNCCATNTWNNNWN | AGATCCCATCTTTAAAT |

**Supplementary Table S4.** Analysis of the correlation between the iron content in the mouse liver and the analyzed genes in microarray

| Gene   | RHO      | <i>p</i> -value | Regulation | Functions                                                                                                                                                        | Reference |
|--------|----------|-----------------|------------|------------------------------------------------------------------------------------------------------------------------------------------------------------------|-----------|
| Scd1   | -0.57471 | 0.002321        | Down       | <ul style="list-style-type: none"> <li>Fatty Acyl-CoA Biosynthesis</li> <li>Regulation of cholesterol biosynthesis by SREBP</li> </ul>                           | [1,2]     |
| Acs15  | -0.659   | 0.002321        | n.s.       | <ul style="list-style-type: none"> <li>Fatty Acyl-CoA Biosynthesis</li> <li>Regulation of lipid droplet</li> </ul>                                               | [3,4]     |
| Leptin | 0.608648 | 0.000754        | n.s.       | <ul style="list-style-type: none"> <li>AMPK Signaling</li> <li>Adipocytokine signaling pathway</li> </ul>                                                        | [5]       |
| ASXL1  | -0.54461 | 0.003154        | Up         | <ul style="list-style-type: none"> <li>Transcriptional regulator of adipogenesis, acting to repress PPAR<math>\gamma</math> adipocyte differentiation</li> </ul> | [6]       |
| GATA2  | -0.54351 | 0.003225        | n.s.       | <ul style="list-style-type: none"> <li>Regulation of differentiation of brown adipocytes</li> <li>Inhibitor of PPAR<math>\gamma</math></li> </ul>                | [7]       |

All data was given in a study by McLachlan, S., et al. [8]. Abbreviation: Scd1; Stearoyl-CoA desaturase-1, Acs15; Acyl-CoA Synthetase Long Chain Family Member 5, ASXL1; Additional Sex Comb-Like Protein 1, Gata2; GATA Binding Protein

**Supplementary Figure S1.** The standard curve for measurement of total glutathione (tGSH) contents

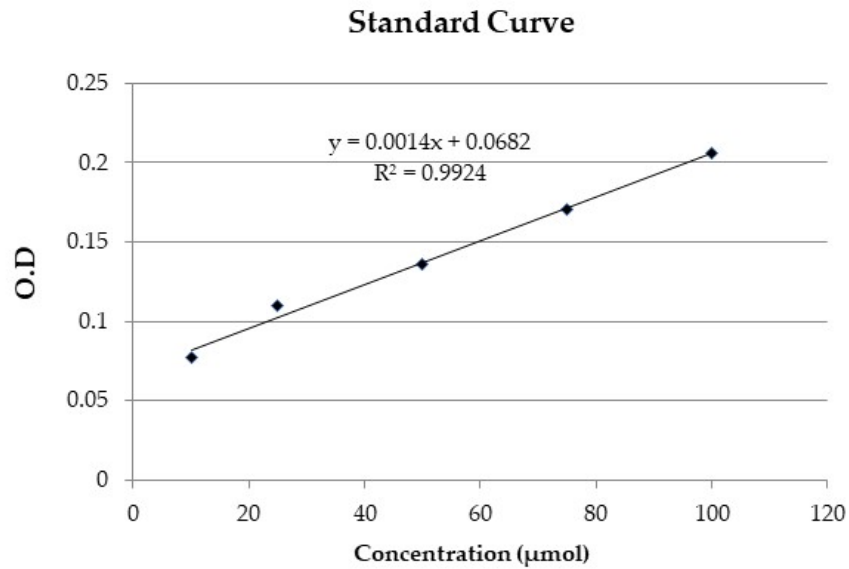

## Reference

1. Ntambi, J.M.; Miyazaki, M.; Stoeckl, J.P.; Lan, H.; Kendziorski, C.M.; Yandell, B.S.; Song, Y.; Cohen, P.; Friedman, J.M.; Attie, A.D. Loss of stearoyl-CoA desaturase-1 function protects mice against adiposity. *Proceedings of the National Academy of Sciences* **2002**, *99*, 11482-11486.
2. Sekiya, M.; Yahagi, N.; Matsuzaka, T.; Takeuchi, Y.; Nakagawa, Y.; Takahashi, H.; Okazaki, H.; Iizuka, Y.; Ohashi, K.; Gotoda, T. SREBP-1-independent regulation of lipogenic gene expression in adipocytes. *Journal of lipid research* **2007**, *48*, 1581-1591.
3. Bowman, T.A.; O'Keeffe, K.R.; D'Aquila, T.; Yan, Q.W.; Griffin, J.D.; Killion, E.A.; Salter, D.M.; Mashek, D.G.; Buhman, K.K.; Greenberg, A.S. Acyl CoA synthetase 5 (ACSL5) ablation in mice increases energy expenditure and insulin sensitivity and delays fat absorption. *Molecular metabolism* **2016**, *5*, 210-220.
4. Zhang, M.; Liu, Y.; Shi, H.; Guo, M.; Chai, M.; He, Q.; Yan, M.; Cao, D.; Zhao, L.; Cai, H. Evolutionary and expression analyses of soybean basic Leucine zipper transcription factor family. *BMC genomics* **2018**, *19*, 1-14.
5. Lage, R.; Diéguez, C.; Vidal-Puig, A.; López, M. AMPK: a metabolic gauge regulating whole-body energy homeostasis. *Trends in molecular medicine* **2008**, *14*, 539-549.
6. Park, U.-H.; Yoon, S.K.; Park, T.; Kim, E.-J.; Um, S.-J. Additional sex comb-like (ASXL) proteins 1 and 2 play opposite roles in adipogenesis via reciprocal regulation of peroxisome proliferator-activated receptor  $\gamma$ . *Journal of Biological Chemistry* **2011**, *286*, 1354-1363.
7. Schupp, M.; Cristancho, A.G.; Lefterova, M.I.; Hanniman, E.A.; Briggs, E.R.; Steger, D.J.; Qatanani, M.; Curtin, J.C.; Schug, J.; Ochsner, S.A. Re-expression of GATA2 cooperates with peroxisome proliferator-activated receptor- $\gamma$  depletion to revert the adipocyte phenotype. *Journal of Biological Chemistry* **2009**, *284*, 9458-9464.
8. McLachlan, S.; Lee, S.-M.; Steele, T.M.; Hawthorne, P.L.; Zapala, M.A.; Eskin, E.; Schork, N.J.; Anderson, G.J.; Vulpe, C.D. In silico QTL mapping of basal liver iron levels in inbred mouse strains. *Physiological genomics* **2011**, *43*, 136-147.
